# Supplementary material
Source: PubMed Central journal article supplement (PMC5687849)
Supplement: NIHMS909704-supplement-1.pdf [file NIHMS909704-supplement-1.pdf]

|                        |               | Fasting 12h |      |                    |      | Refeeding 4h |      |                    |     | Statistical analysis                                                             |
|------------------------|---------------|-------------|------|--------------------|------|--------------|------|--------------------|-----|----------------------------------------------------------------------------------|
|                        |               | WT          |      | <i>L-Sin3a/b</i>   |      | WT           |      | <i>L-Sin3a/b</i>   |     |                                                                                  |
| <b>Insulin</b>         | <b>ug/l</b>   | 0.67 ± 0.03 | N=8  | 0.72 ± 0.06        | N=7  | 1.15 ± 0.11  | N=8  | <b>2.10 ± 0.29</b> | N=8 | *** WT vs <i>L-Sin3a/b</i> in refed mice; *** Fast vs Refed in <i>L-Sin3a/b</i>  |
| <b>Glucose</b>         | <b>mg/dl</b>  | 90 ± 3      | N=10 | 93 ± 3             | N=8  | 168 ± 6      | N=10 | 163 ± 9            | N=8 | *** Fast vs Refed in iWT and iL-Sin3a/b                                          |
| <b>FFA</b>             | <b>umol/l</b> | 811 ± 86    | N=10 | <b>612 ± 76</b>    | N=8  | 351 ± 31     | N=10 | 397 ± 53           | N=8 | *** Fast vs Refed in WT                                                          |
| <b>TG</b>              | <b>mg/dl</b>  | 98 ± 4      | N=10 | 93 ± 5             | N=8  | 121 ± 9      | N=10 | <b>205 ± 37</b>    | N=8 | ** WT vs <i>L-Sin3a/b</i> in refed; *** Fast vs Refed in <i>L-Sin3a/b</i>        |
| <b>Cholesterol</b>     | <b>mg/dl</b>  | 131 ± 14.5  | N=10 | <b>193 ± 22</b>    | N=8  | 142 ± 11     | N=10 | <b>236 ± 35</b>    | N=8 | ** WT vs <i>L-Sin3a/b</i> in refed                                               |
| <b>Ketone</b>          | <b>umol/l</b> | 1259 ± 80   | N=10 | <b>924 ± 63</b>    | N=8  | 227 ± 42     | N=10 | <b>149 ± 15</b>    | N=8 | *** WT vs <i>L-Sin3a/b</i> Fast; *** Fast vs Refed in WT and in <i>L-Sin3a/b</i> |
| <b>Total Bile Acid</b> | <b>umol/l</b> | -           |      | -                  |      | 3.6 ± 1.2    | N=5  | <b>32.1 ± 1.8</b>  | N=5 | ***                                                                              |
| <b>Alk. Phos.</b>      | <b>U/l</b>    | 91 ± 12     | N=8  | <b>380 ± 101</b>   | N=7  | -            |      | -                  |     | **                                                                               |
| <b>GGT</b>             | <b>U/l</b>    | 2.4 ± 0.6   | N=8  | 2.5 ± 0.2          | N=11 | -            |      | -                  |     |                                                                                  |
| <b>AST(SGOT)</b>       | <b>U/l</b>    | 110 ± 16    | N=8  | <b>324 ± 57</b>    | N=9  | -            |      | -                  |     | **                                                                               |
| <b>ALT(SGPT)</b>       | <b>U/l</b>    | 50 ± 7      | N=8  | <b>241 ± 57</b>    | N=10 | -            |      | -                  |     | **                                                                               |
| <b>Amylase</b>         | <b>U/l</b>    | 2389 ± 232  | N=6  | 2186 ± 176         | N=9  | -            |      | -                  |     |                                                                                  |
| <b>BUN</b>             | <b>mg/dl</b>  | 31 ± 1      | N=8  | 37 ± 5             | N=10 | -            |      | -                  |     |                                                                                  |
| <b>Phosphorus</b>      | <b>mg/dl</b>  | 10.6 ± 0.7  | N=8  | 10.7 ± 0.9         | N=10 | -            |      | -                  |     |                                                                                  |
| <b>Calcium</b>         | <b>mg/dl</b>  | 10.4 ± 0.4  | N=8  | 10.6 ± 0.5         | N=10 | -            |      | -                  |     |                                                                                  |
| <b>Albumin</b>         | <b>g/dl</b>   | 3.49 ± 0.07 | N=8  | 3.4 ± 0.3          | N=10 | -            |      | -                  |     |                                                                                  |
| <b>Cholesterol</b>     | <b>mg/dl</b>  | 110 ± 4     | N=8  | <b>235 ± 50</b>    | N=10 | -            |      | -                  |     | *                                                                                |
| <b>Uric Acid</b>       | <b>mg/dl</b>  | 1.3 ± 0.1   | N=8  | 1.1 ± 0.1          | N=10 | -            |      | -                  |     |                                                                                  |
| <b>CPK</b>             | <b>U/l</b>    | 410 ± 101   | N=8  | 502 ± 124          | N=10 | -            |      | -                  |     |                                                                                  |
| <b>Creatinine</b>      | <b>mg/dl</b>  | <0.19       | N=8  | <0.19              | N=10 | -            |      | -                  |     |                                                                                  |
| <b>Total Bilirubin</b> | <b>mg/dl</b>  | 0.08 ± 0.01 | N=8  | <b>0.13 ± 0.01</b> | N=10 | -            |      | -                  |     | **                                                                               |
| <b>Total Protein</b>   | <b>g/dl</b>   | 5.1 ± 0.3   | N=8  | 5.2 ± 0.4          | N=10 | -            |      | -                  |     |                                                                                  |
| <b>Globulin</b>        | <b>g/dl</b>   | 1.9 ± 0.1   | N=7  | 2.0 ± 0.3          | N=9  | -            |      | -                  |     |                                                                                  |
| <b>Bun/Creat</b>       | <b>-</b>      | 164 ± 5     | N=8  | 195 ± 26           | N=10 | -            |      | -                  |     |                                                                                  |
| <b>Alb/Glob</b>        | <b>-</b>      | 1.87 ± 0.11 | N=7  | 3.67 ± 1.64        | N=9  | -            |      | -                  |     |                                                                                  |

**Table S1. Relative to Figure 5.** Blood analysis in WT vs. *L-Sin3a/b* (constitutive KO) in fasting vs. refeeding conditions. FFA=Free Fatty Acid; TG=Triglyceride; GGT= Gamma-Glutamyl Transferase; AST= Aspartate transaminase; ALT= Alanine transaminase; BUN= Blood Urea Nitrogen; CPK= Creatine phosphokinase.

|                 |        | Fasting 12h |     |                    |     | Refeeding 4h |     |                    |     | Statistical analysis                                                                                                        |
|-----------------|--------|-------------|-----|--------------------|-----|--------------|-----|--------------------|-----|-----------------------------------------------------------------------------------------------------------------------------|
|                 |        | WT          |     | iL- <i>Sin3a/b</i> |     | WT Refed     |     | iL- <i>Sin3a/b</i> |     |                                                                                                                             |
| Insulin         | ug/l   | 0.78 ± 0.14 | N=6 | 0.70 ± 0.07        | N=7 | 2.16 ± 0.18  | N=6 | 1.79 ± 0.36        | N=5 | ** Fast vs Refed in iWT and iL- <i>Sin3a/b</i>                                                                              |
| Glucose         | mg/dl  | 120 ± 8     | N=6 | <b>89 ± 3</b>      | N=7 | 155 ± 6      | N=9 | <b>136 ± 5</b>     | N=9 | ** iWT vs iL- <i>Sin3a/b</i> in Fast; * iWT vs iL- <i>Sin3a/b</i> in Refed; *** Fast vs Refed in iWT and iL- <i>Sin3a/b</i> |
| FFA             | umol/l | 394 ± 51    | N=6 | 500 ± 35           | N=7 | 112 ± 19     | N=9 | 132 ± 21           | N=9 | *** Fast vs Refed in iWT and iL- <i>Sin3a/b</i>                                                                             |
| TG              | mg/dl  | 94 ± 13     | N=6 | <b>78 ± 9</b>      | N=7 | 117 ± 14     | N=9 | 100 ± 9            | N=9 | NS                                                                                                                          |
| Cholesterol     | mg/dl  | 97 ± 6      | N=6 | <b>63 ± 6</b>      | N=7 | 99 ± 2       | N=9 | <b>80 ± 4</b>      | N=9 | * Fast vs Refed in iL- <i>Sin3a/b</i> ; *** iWT vs iL- <i>Sin3a/b</i> in Fast; ** iWT vs iL- <i>Sin3a/b</i> in refed        |
| Ketone          | umol/l | 579 ± 131   | N=6 | 458 ± 73           | N=7 | 150 ± 10     | N=9 | 183 ± 15           | N=9 | *** Fast vs Refed in iWT + ** Fast vs Refed in iL- <i>Sin3a/b</i>                                                           |
| Alk. Phos.      | U/l    | 59 ± 4      | N=7 | <b>92 ± 13</b>     | N=9 | -            |     | -                  |     | NS                                                                                                                          |
| GGT             | U/l    | 1.7 ± 0.6   | N=7 | 0.9 ± 0.4          | N=9 | -            |     | -                  |     |                                                                                                                             |
| AST(SGOT)       | U/l    | 147 ± 23    | N=7 | <b>407 ± 54</b>    | N=8 | -            |     | -                  |     | **                                                                                                                          |
| ALT(SGPT)       | U/l    | 62 ± 9      | N=7 | <b>275 ± 87</b>    | N=7 | -            |     | -                  |     | *                                                                                                                           |
| Amylase         | U/l    | 1922 ± 134  | N=7 | 2138 ± 127         | N=7 | -            |     | -                  |     |                                                                                                                             |
| BUN             | mg/dl  | 31 ± 2      | N=7 | 38 ± 4             | N=9 | -            |     | -                  |     |                                                                                                                             |
| Phosphorus      | mg/dl  | 9.5 ± 0.5   | N=7 | 10.7 ± 1.1         | N=9 | -            |     | -                  |     |                                                                                                                             |
| Calcium         | mg/dl  | 10.4 ± 0.5  | N=7 | 10.7 ± 0.6         | N=9 | -            |     | -                  |     |                                                                                                                             |
| Albumin         | g/dl   | 3.3 ± 0.1   | N=7 | 3.7 ± 0.3          | N=9 | -            |     | -                  |     |                                                                                                                             |
| Cholesterol     | mg/dl  | 90 ± 6      | N=7 | <b>70 ± 6</b>      | N=9 | -            |     | -                  |     | *                                                                                                                           |
| Uric Acid       | mg/dl  | 1.1 ± 0.1   | N=7 | 1.5 ± 0.2          | N=9 | -            |     | -                  |     |                                                                                                                             |
| CPK             | U/l    | 399 ± 90    | N=7 | <b>624 ± 56</b>    | N=6 | -            |     | -                  |     | NS                                                                                                                          |
| Creatinine      | mg/dl  | 0.2 ± 0.003 | N=7 | 0.21 ± 0.02        | N=9 | -            |     | -                  |     |                                                                                                                             |
| Total Bilirubin | mg/dl  | 0.08 ± 0.02 | N=7 | <b>0.12 ± 0.02</b> | N=9 | -            |     | -                  |     | NS                                                                                                                          |
| Total Protein   | g/dl   | 5.2 ± 0.1   | N=7 | 5.3 ± 0.1          | N=9 | -            |     | -                  |     |                                                                                                                             |
| Globulin        | g/dl   | 1.9 ± 0.1   | N=7 | 2.0 ± 0.1          | N=8 | -            |     | -                  |     |                                                                                                                             |
| Bun/Creat       | -      | 160 ± 11    | N=7 | 189 ± 22           | N=9 | -            |     | -                  |     |                                                                                                                             |
| Alb/Glob        | -      | 1.78 ± 0.18 | N=7 | 1.70 ± 0.13        | N=8 | -            |     | -                  |     |                                                                                                                             |

**Table S2. Relative to Figure 6.** Blood analysis in WT vs. iL-*Sin3a/b* (induced KO) in fasting vs. refeeding conditions. FFA=Free Fatty Acid; TG=Triglyceride; GGT= Gamma-Glutamyl Transferase; AST= Aspartate transaminase; ALT= Alanine transaminase; BUN= Blood Urea Nitrogen; CPK= Creatine phosphokinase.

| Compound | hFoxO1<br>(IC <sub>50</sub> ) | hFoxA2<br>(IC <sub>50</sub> ) | hFoxO3<br>(IC <sub>50</sub> ) | mFoxO1<br>(IC <sub>50</sub> ) |
|----------|-------------------------------|-------------------------------|-------------------------------|-------------------------------|
| 1        | 2.59                          | >50                           | >50                           | 2.52                          |
| 2        | 1.53                          | >50                           | 1.36                          | 1.92                          |
| 3        | 0.68                          | >50                           | n.a.                          | n.a.                          |
| 4        | 5.09                          | >50                           | n.a.                          | n.a.                          |
| 5        | 2.56                          | 2.88                          | n.a.                          | n.a.                          |
| 6        | 3.39                          | n.d.                          | 3.95                          | n.a.                          |
| 7        | 0.83                          | n.d.                          | 1.1                           | n.a.                          |
| 8        | 2.91                          | 31                            | 3.03                          | 2.64                          |
| 9        | 0.04                          | >50                           | 9.17                          | 0.04                          |
| 10       | 0.21                          | >50                           | 0.03                          | 0.14                          |
| 11       | 0.49                          | 2.29                          | 0.71                          | 0.54                          |
| 12       | 1.9                           | 11.2                          | 0.84                          | 0.6                           |
| 13       | 1.9                           | >50                           | 5.61                          | 1.56                          |

**Table S3. Relative to Figure 7.** Reporter gene assay IC<sub>50</sub> values (μM) for compound 1-13. h = human; m = mouse; n.a. = Not analyzed; n.d. = Not determined due to irregular curve shape at the highest concentrations tested.

| Compound | Tolerated p.o. dose<br>( $\mu\text{mol/kg}$ ) | $C_{\text{max}}$<br>( $\mu\text{M}$ ) | $T_{1/2}$<br>(h) | $T_{\text{max}}$<br>(h) | mFoxO1 $IC_{50}$<br>( $\mu\text{M}$ ) | Fraction unbound<br>(%) | $C_{\text{max}}$ u /<br>mFoxO1 $IC_{50}$ |
|----------|-----------------------------------------------|---------------------------------------|------------------|-------------------------|---------------------------------------|-------------------------|------------------------------------------|
| 8        | 25                                            | 4.5                                   | 1.3              | 0.17                    | 2.5                                   | 52                      | 0.94                                     |
| 9        | 100                                           | 0.034                                 | 2.5              | 0.67                    | 0.041                                 | 0.4                     | 0.003                                    |
| 13       | 50                                            | 7.3                                   | 1.3              | 0.33                    | 1.6                                   | 16                      | 0.73                                     |

**Table S4. Relative to Figure7.** Pharmacokinetics of compound 8, 9 and 13 *in vivo* in mice. Data are average means ( $n=3$ ).
